# Supplementary material
Source: publisher site journal article supplement (https://www.dovepress.com/article/487080)
Supplement: Supplementary file 1 [file get_supplementary_file.php]

**Table S1.** Agents administration protocol.

| **Agents** | **Targets** | **Administration** |
| --- | --- | --- |
| **Anti-PD-(L)1 agents administration** | | |
| Atezolizumab | PD-L1 | 1200 mg once every 3 weeks, intravenous infusion |
| Camrelizumab | PD-1 | 200 mg once every 3 weeks, intravenous infusion |
| Sintilimab | PD-1 | 200 mg once every 3 weeks, intravenous infusion |
| Tislelizumab | PD-1 | 200 mg once every 3 weeks, intravenous infusion |
| Toripalimab | PD-1 | 240 mg once every 3 weeks, intravenous infusion |
| **Molecular targeted agents administration** | | |
| Apatinib | VEGFR2 | 250 mg QD |
| Bevacizumab | VEGFA | 15 mg/kg once every 3 weeks, intravenous infusion |
| Lenvatinib | VEGFR1–VEGFR3, PDGFR, FGFR1–FGFR4, RET | 8 mg QD (for bodyweight <60 kg) or 12mg QD (for bodyweight ≥60 kg) |
| Sorafenib | VEGFR1–VEGFR3,  PDGFR, RAF kinase, KIT receptor | 400 mg BID |

PD-(L)1, programmed cell death-1 and ligand; VEGFR, vascular endothelial growth factor receptor; PDGFR, platelet-derived growth factor receptors.


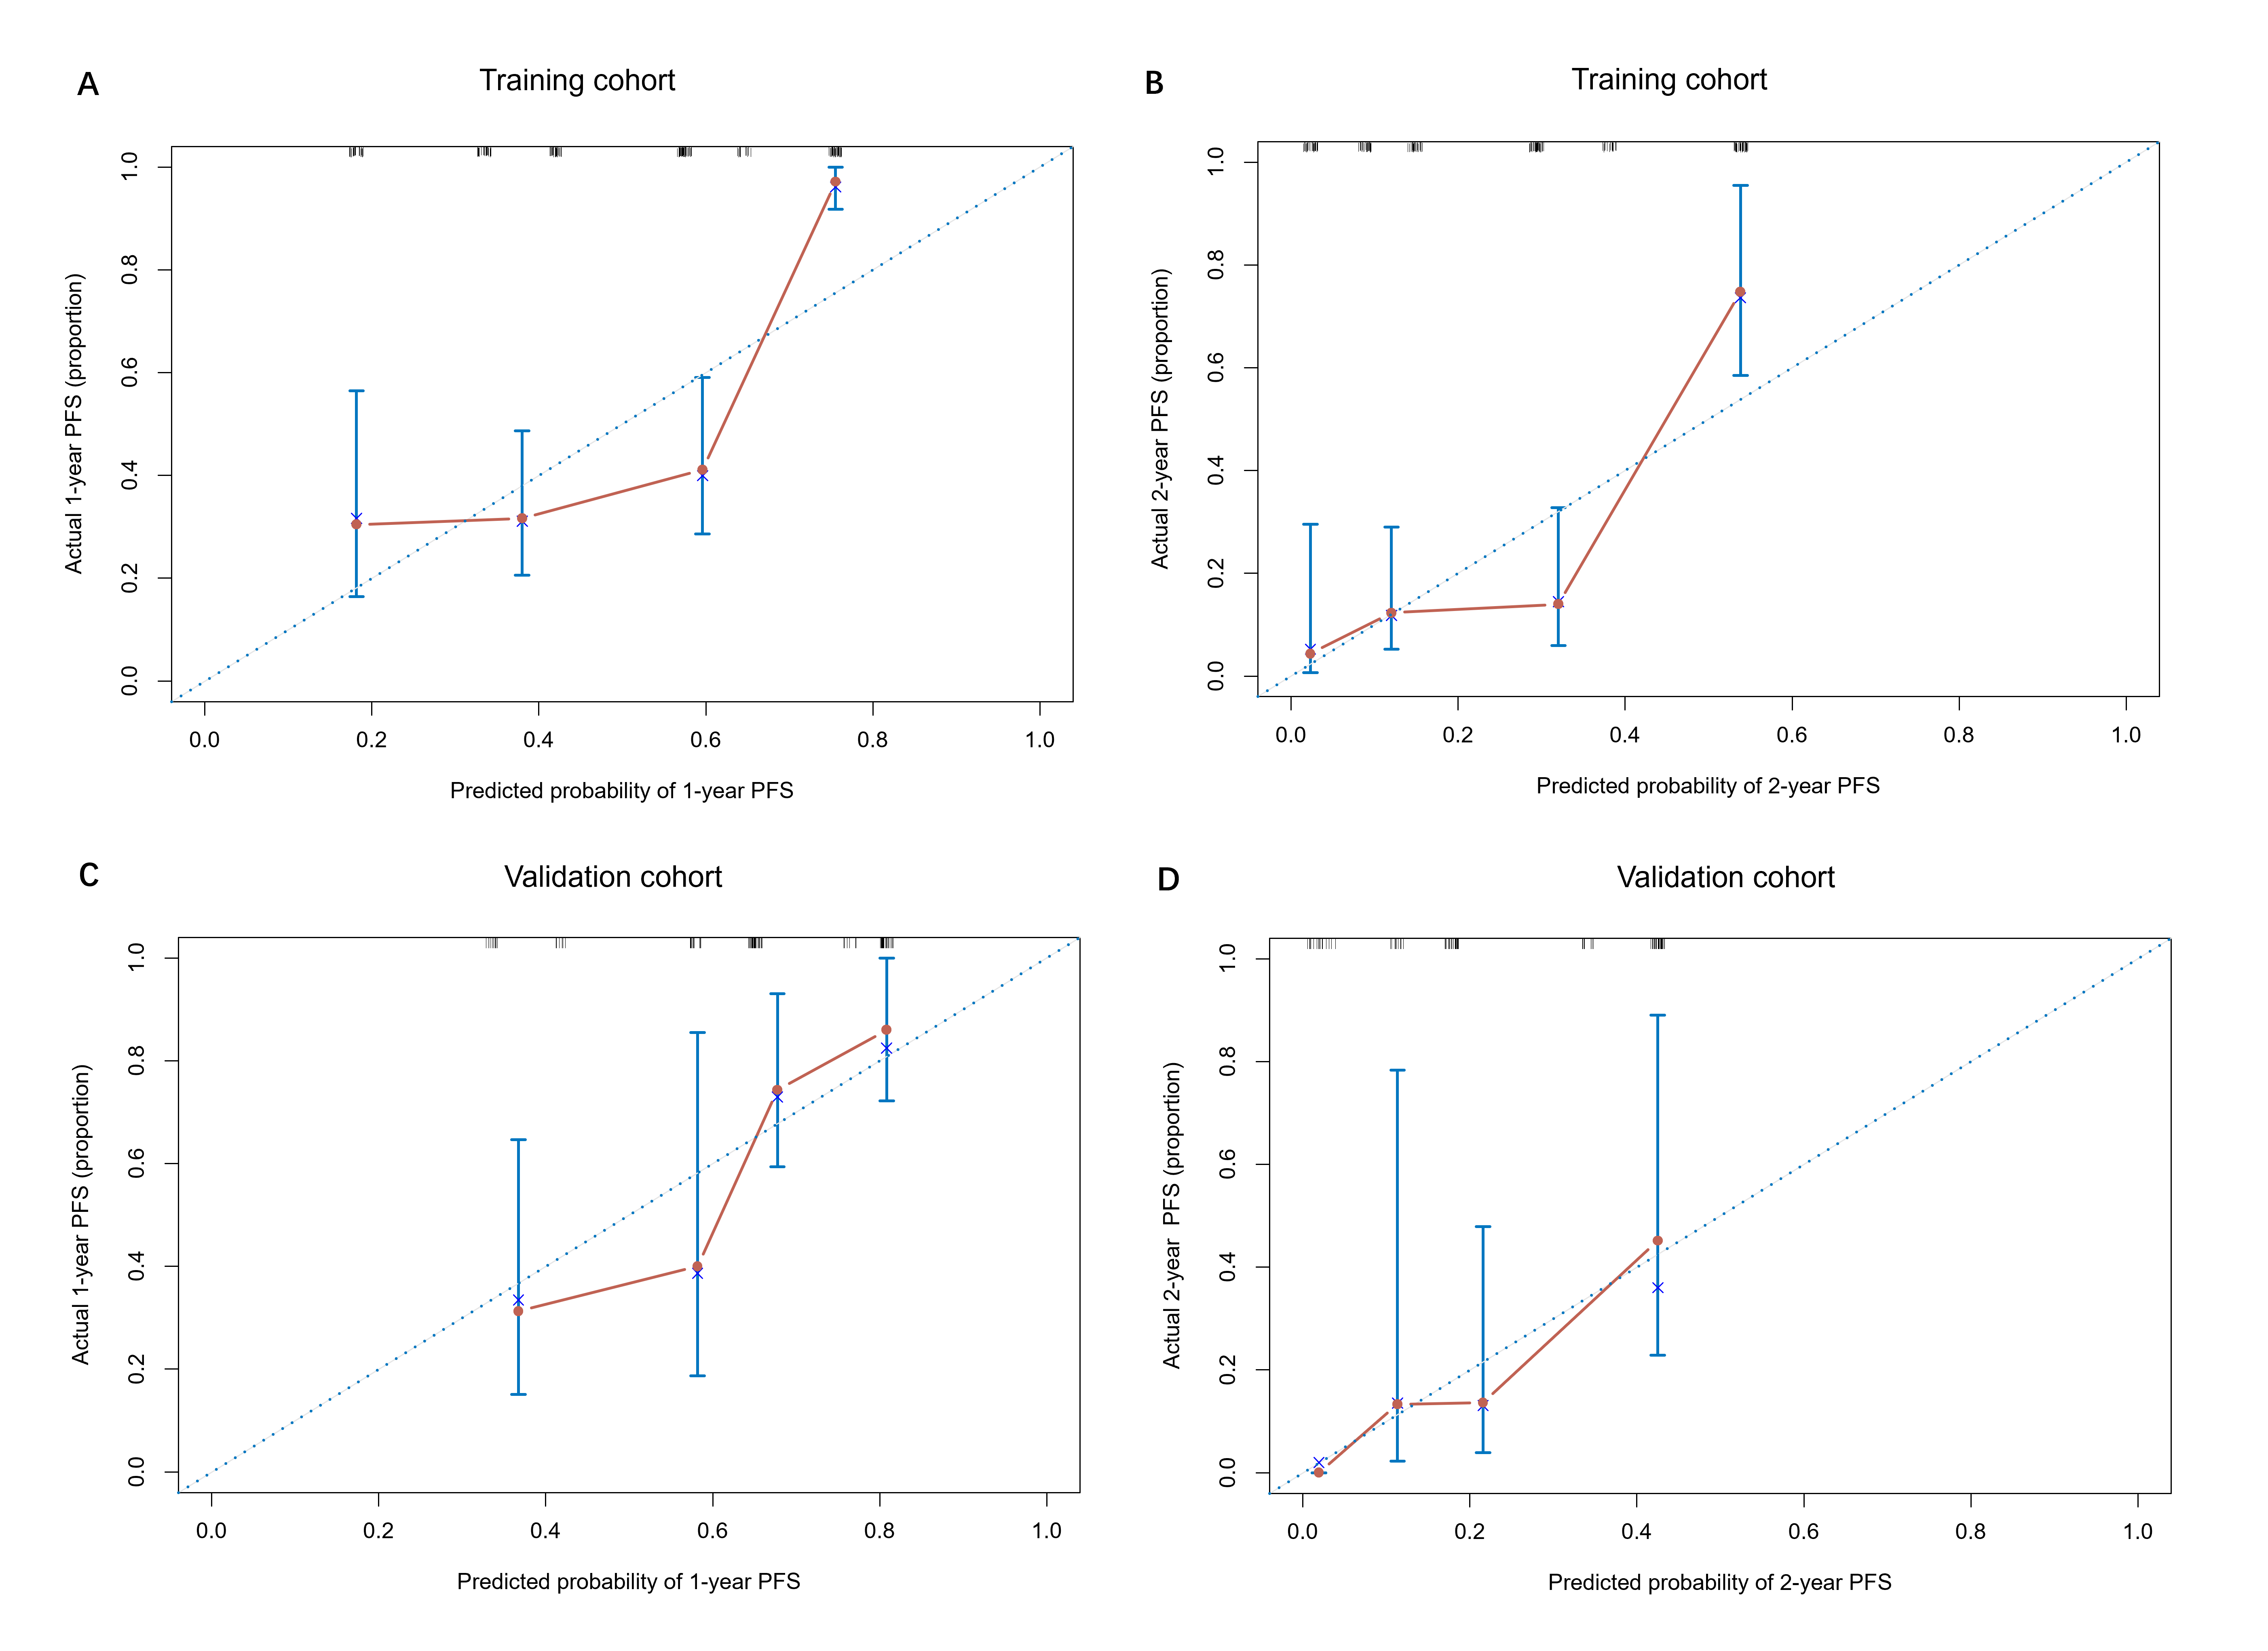


**Figure S1:** Calibration curves for predicting 1- and 2-year progression-free survival (PFS) probabilities in the training and validation cohorts. (A) 1-year PFS in the training cohort. (B) 2-year PFS in the training cohort. (C) 1-year PFS in the validation cohort. (D) 2-year PFS in the validation cohort.


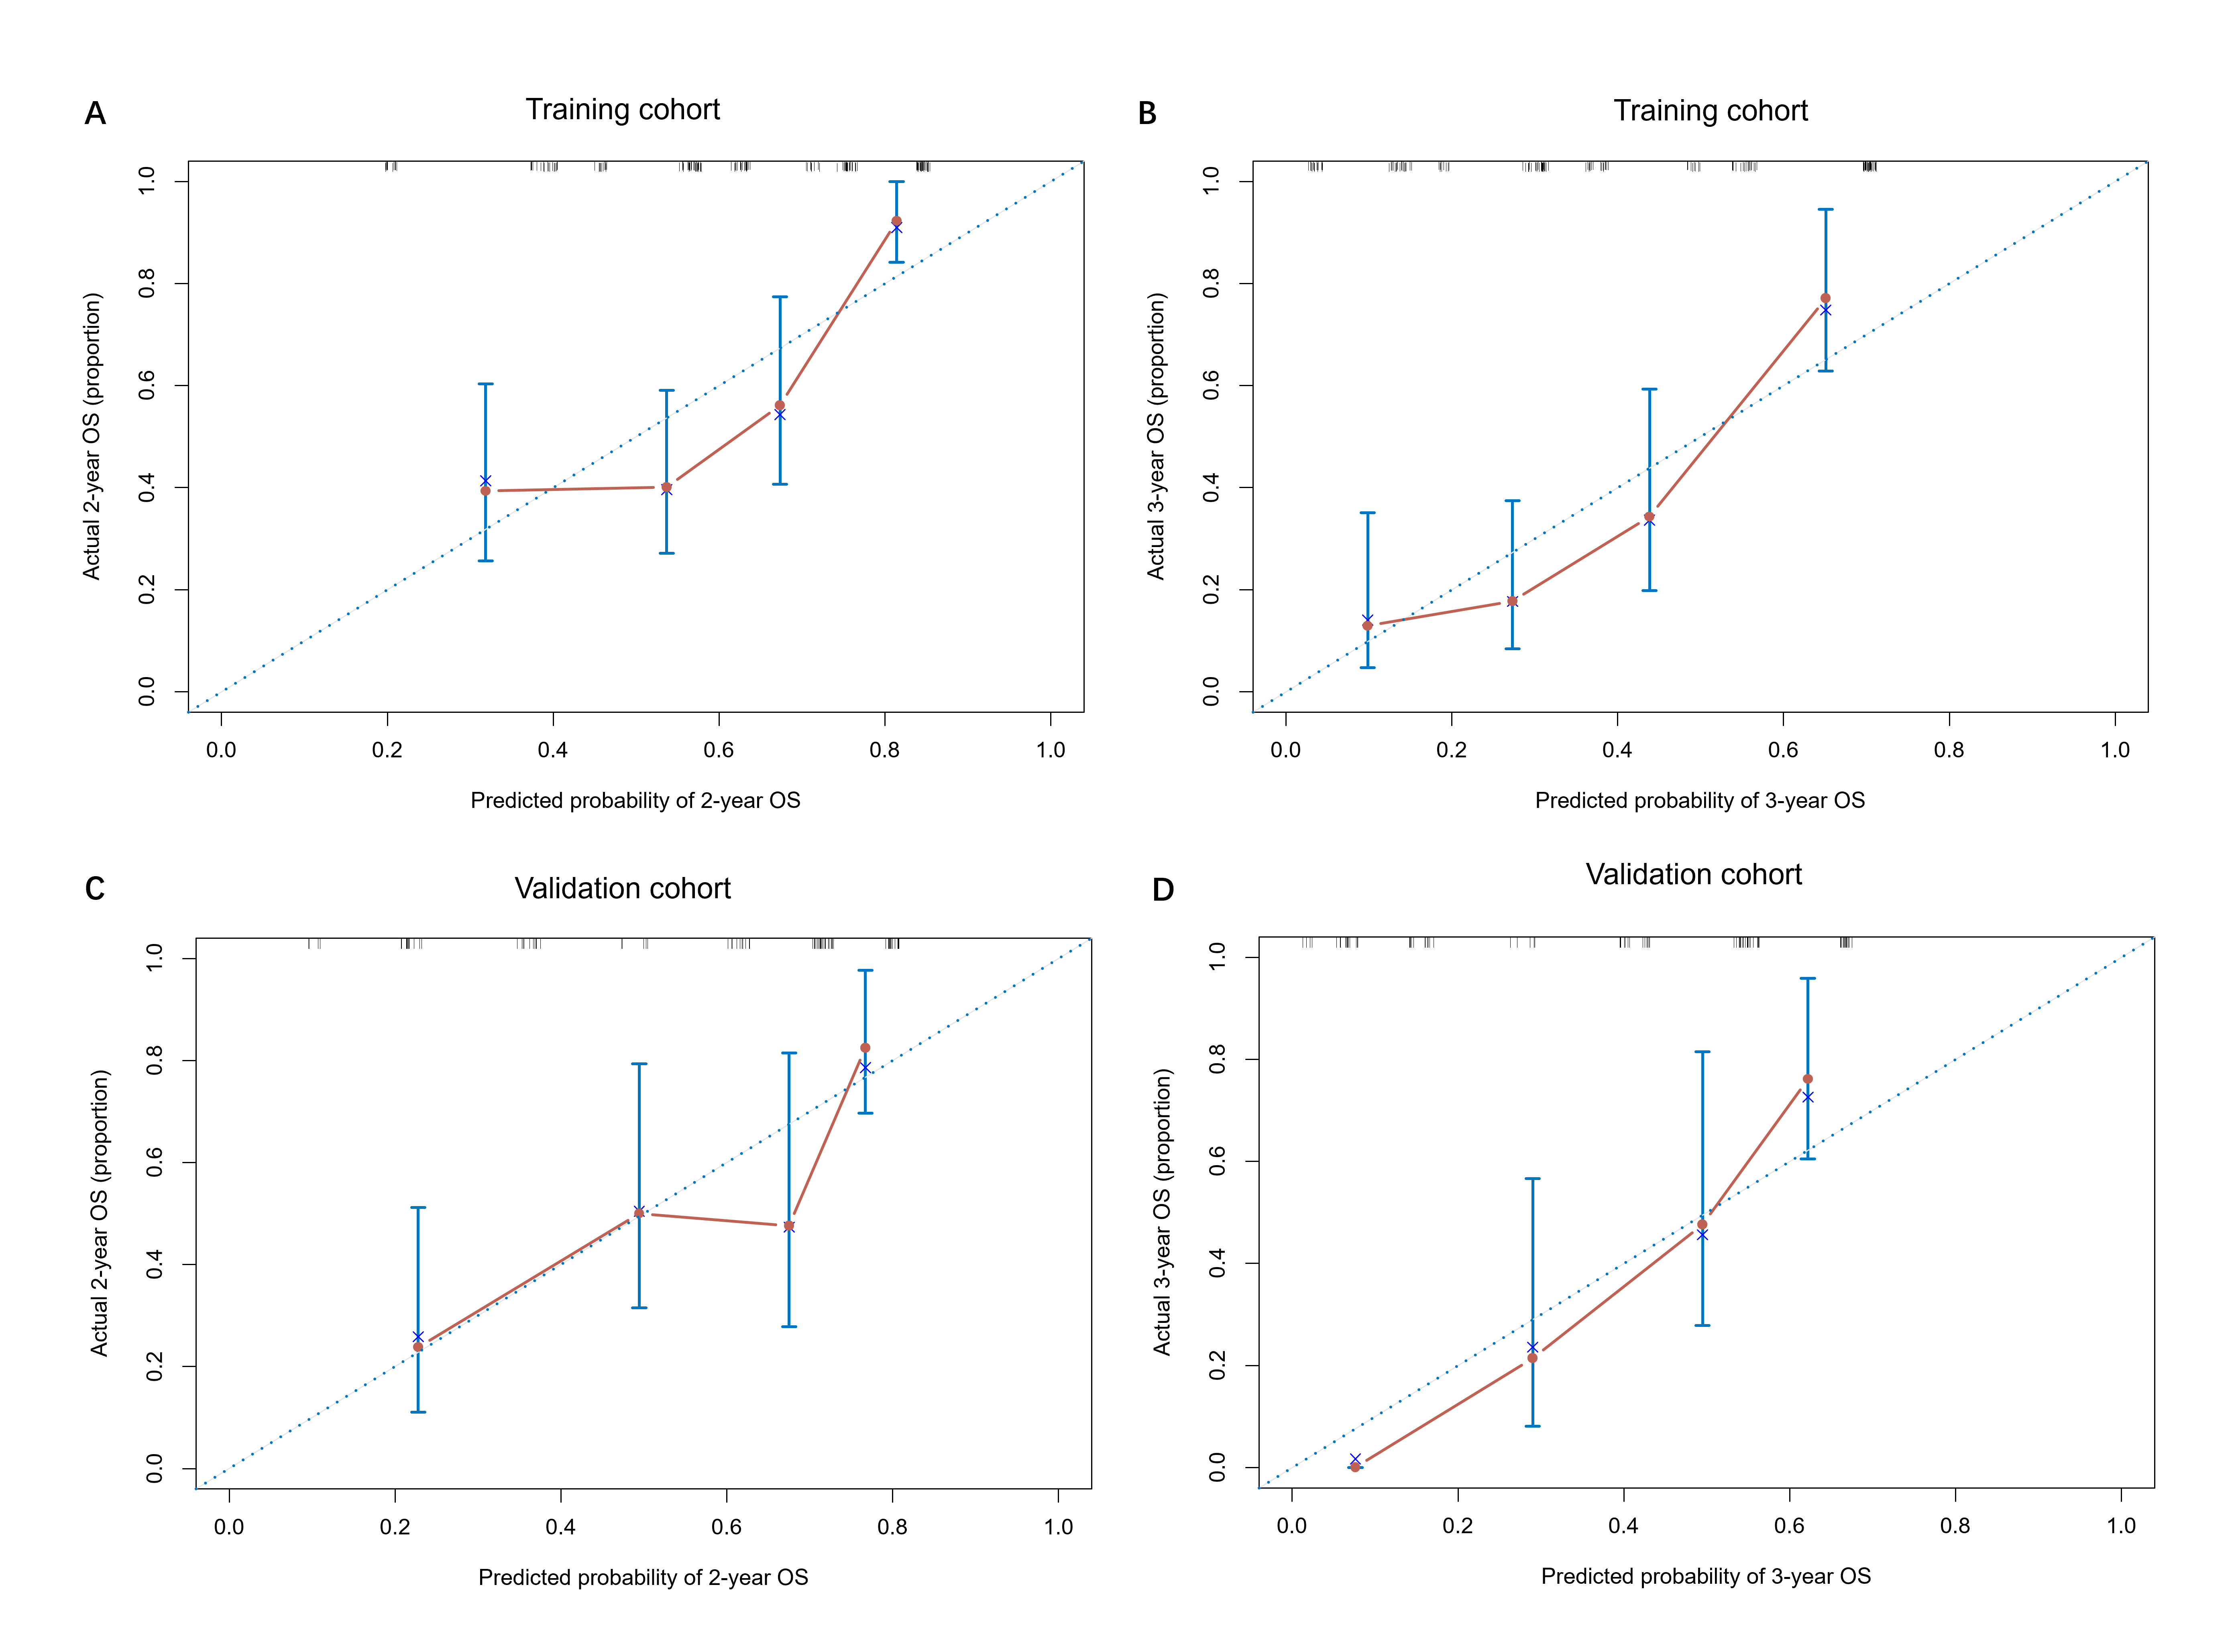


**Figure S2:** Calibration curves for predicting the 2- and 3-year overall survival (OS) probabilities in the training and validation cohorts. (A) 2-year OS in the training cohort. (B) 3-year OS in the training cohort. (C) 2-year OS in the validation cohort. (D) 3-year OS in the validation cohort.
